# Supplementary material for: The basis for reevaluating the reactivity of pyrite surfaces: spin states and crystal field d-orbital splitting energies of bulk, terrace, edge, and corner Fe(ii) ions
Source: Royal Society of Chemistry journal article supplement (doi:10.1039/c8cp05459b), 2019-01-01
Supplement: c8cp05459b1.pdf [file c8cp05459b1.pdf]

# The basis for reevaluating the reactivity of pyrite surfaces: spin states and crystal field d-orbital splitting energies of bulk, terrace, edge, and corner Fe(II) ions

*Krishnamoorthy Arumugam<sup>1\*‡</sup>, Devon Renock<sup>2</sup>, and Udo Becker<sup>1\*</sup>*

<sup>1</sup> Department of Earth and Environmental Sciences, University of Michigan, 1100 North University Avenue, 2534 NUB, Ann Arbor, MI 48109-1005, USA.

<sup>2</sup> Department of Earth Sciences, Dartmouth College, Hanover, NH 03755.

‡ Current address: National Post Doctoral Fellow, Simulation Center for Atomic and Nanoscale MATerials (SCANMAT), Central University of Tamil Nadu, Thiruvarur, Tamil Nadu, 610101, India.

**\*corresponding authors: Krishnamoorthy Arumugam (+91 9786138099) and Udo Becker**

**Phone: +1 734 615 6894**

**email: [krish.odc@gmail.com](mailto:krish.odc@gmail.com)**

**[ubecker@umich.edu](mailto:ubecker@umich.edu)**

## Electronic Supplementary Information

## Figures

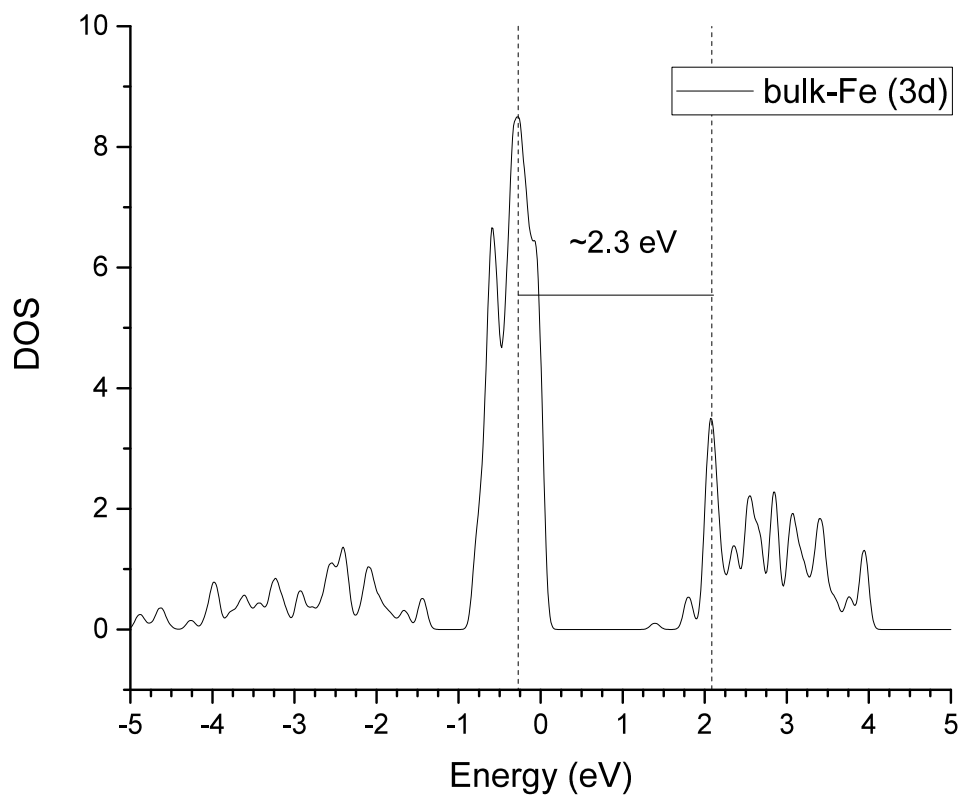

Figure S1. Partial DOS of bulk-Fe(3d) orbitals of pyrite calculated using DMol<sup>3</sup>. The different peaks correspond to further splittings within the  $t_{2g}$  and  $e_g$  sets. Rather than taking the difference between the edges, taking the difference between maximum of peaks of the edge includes some amount of internal splitting energy to the overall splitting. The vertical lines correspond to the peak maxima. However, this is just an approximation.

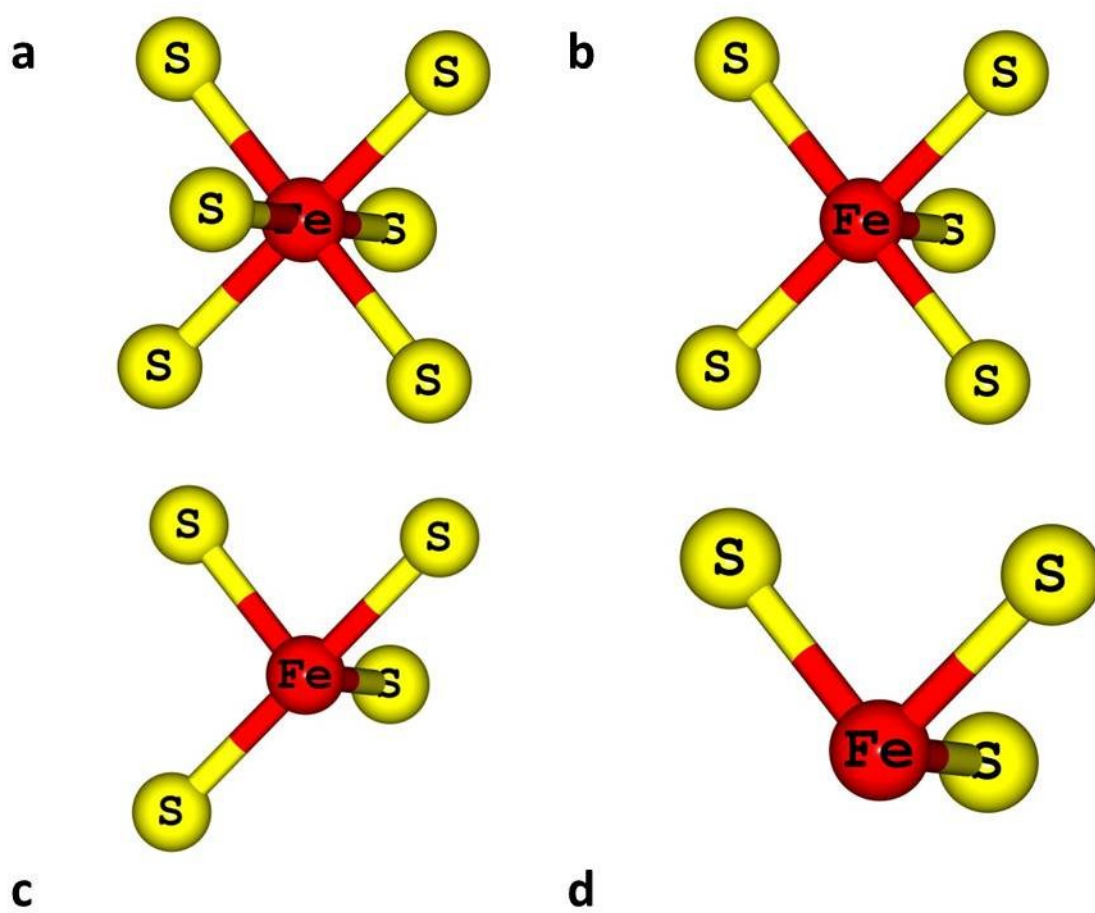

Figure S2. Pyrite fragments:  $FeS_6$ - $O_h$  (a),  $FeS_5$ -square pyramidal (b),  $FeS_4$ -edge (c), and  $FeS_3$ -corner (d).

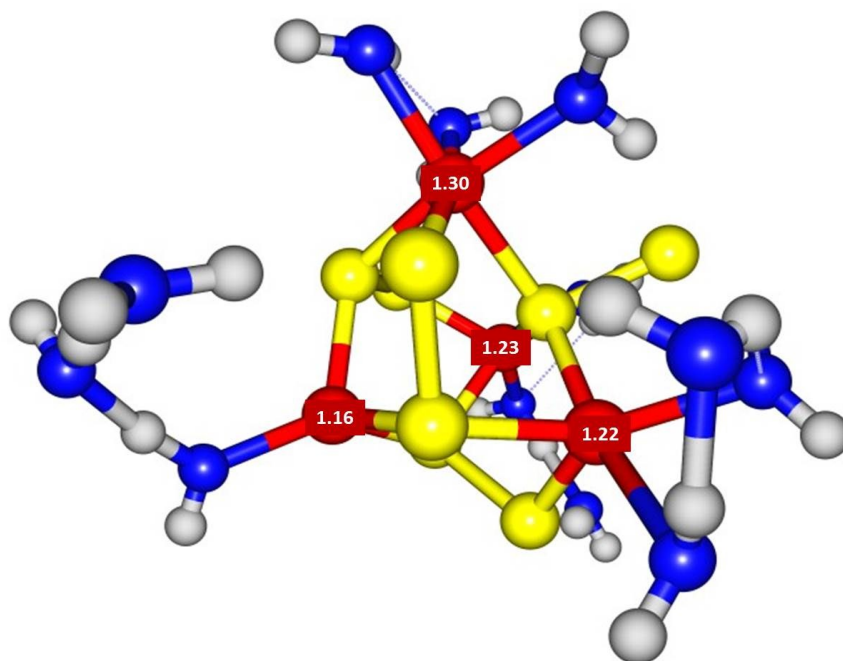

Figure S3a.  $Fe_4S_8$ -cluster model (HS-FM state) with 12 geometry-optimized water molecules shows Bader charges.

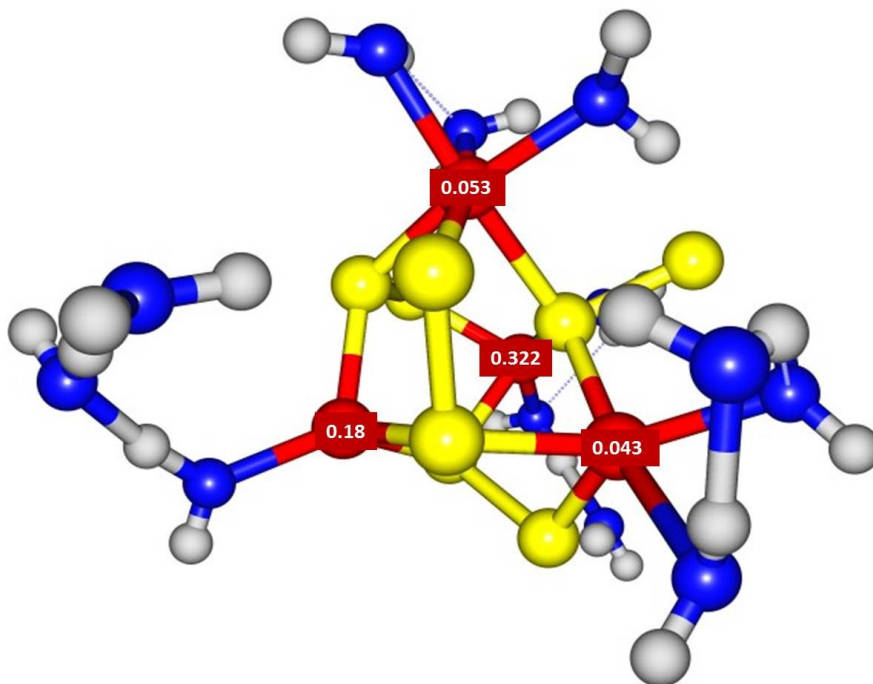

Figure S3b.  $Fe_4S_8$ -cluster model (HS-FM state) with 12 geometry-optimized water molecules shows CFSE in eV.

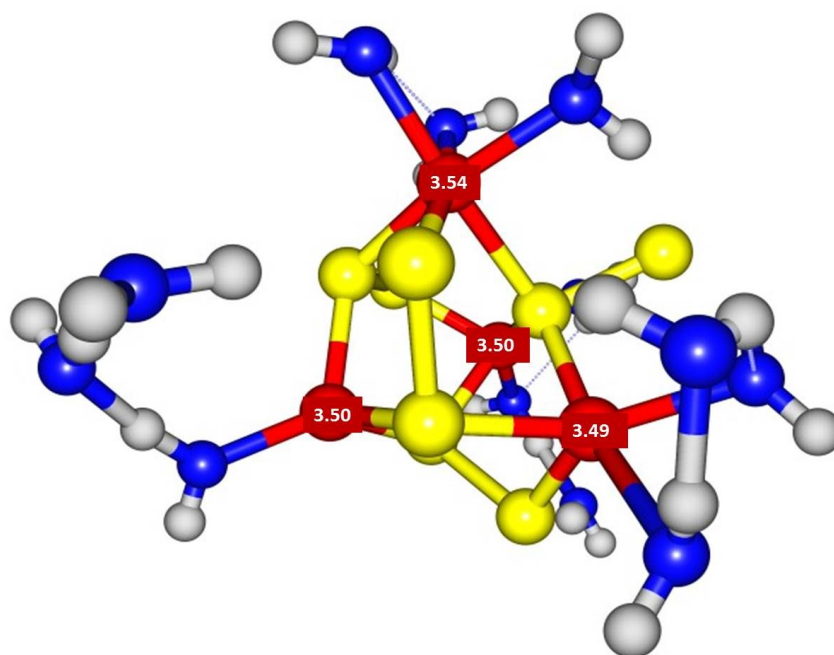

Figure S3c.  $Fe_4S_8$ -cluster model (HS-FM state) with 12 geometry-optimized water molecules shows Bader spins.

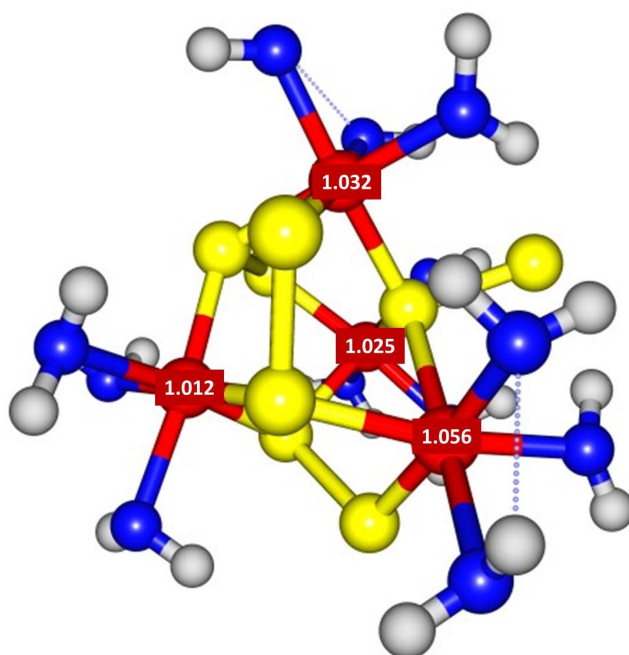

Figure S3d.  $Fe_4S_8$ -cluster model (LS-singlet state) with 12 geometry-optimized water molecules shows Bader charges.

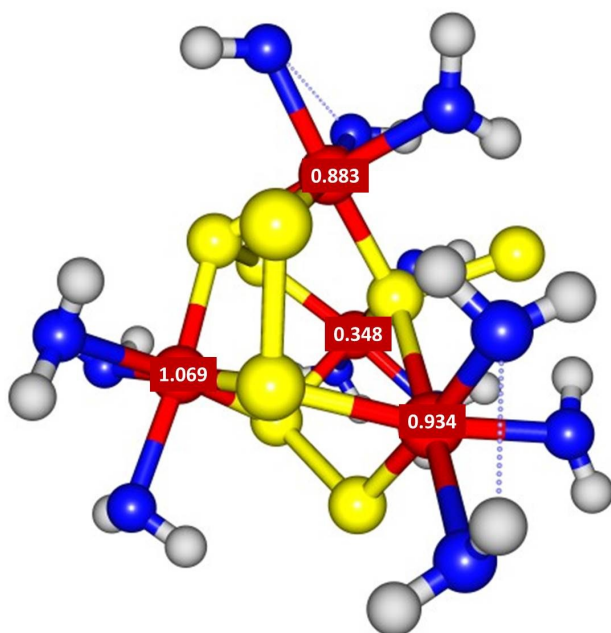

Figure S3e.  $Fe_4S_8$ -cluster model (LS-singlet state) with 12 geometry-optimized water molecules shows CFSE in eV.

## Tables

Table S1. Relative energies of  $(Fe_4S_8)_n$ ,  $n=1,2,3,4$ , and 6, and  $Fe_{18}S_{36}$  pyrite cluster models as a function possible overall spin multiplicities computed at the DFT-B3LYP method (kJ/mol).

| Spin | $Fe_4S_8$ | $Fe_8S_{16}$ | $Fe_{16}S_{32}$ |
|------|-----------|--------------|-----------------|
| 1    | 0         | 0            | 0               |
| 5    | -39.38    | -186.82      | -93.75          |
| 9    | -213.13   | -247.26      | -136.70         |
| 13   | -223.68   | -293.71      | -397.83         |
| 17   | -334.68   | -358.76      | -375.14         |
| 21   |           | -421.02      | -416.36         |
| 25   |           | -477.07      | -455.16         |
| 29   |           | -510.88      | -583.44         |
| 33   |           | -510.52      | -614.40         |
| 37   |           |              | -630.21         |
| 41   |           |              | -670.25         |
| 45   |           |              | -688.45         |
| 49   |           |              | -697.47         |
| 53   |           |              | -718.30         |
| 57   |           |              | -711.49         |
| 61   |           |              | -602.74         |
| 65   |           |              | -486.65         |

Table S2. Bader charges and spins of the Fe<sub>4</sub>S<sub>8</sub> and Fe<sub>4</sub>S<sub>8</sub>-(H<sub>2</sub>O)<sub>12</sub> models calculated for the LS singlet and HS-FM states (eV).

| Fe(II) | Fe <sub>4</sub> S <sub>8</sub> |              |            | Fe <sub>4</sub> S <sub>8</sub> -(H <sub>2</sub> O) <sub>12</sub> |              |            |
|--------|--------------------------------|--------------|------------|------------------------------------------------------------------|--------------|------------|
|        | (0,1)                          | (0,17)       |            | (0,1)                                                            | (0,17)       |            |
|        | Bader/charge                   | Bader/charge | Bader/spin | Bader/charge                                                     | Bader/charge | Bader/spin |
| 2Fe    | 0.834                          | 1.033        | 3.423      | 1.025                                                            | 1.221        | 3.492      |
| 7Fe    | 0.835                          | 1.036        | 3.413      | 1.032                                                            | 1.236        | 3.498      |
| 10Fe   | 0.826                          | 1.044        | 3.509      | 1.012                                                            | 1.163        | 3.503      |
| 12Fe   | 0.834                          | 1.029        | 3.420      | 1.056                                                            | 1.304        | 3.548      |

Table S3. CFSEs (eV) of Fe(II) ions of the Fe<sub>16</sub>S<sub>32</sub> cluster calculated using the B3LYP functional (SM=1, 53, and 57).

| Fe <sub>16</sub> S <sub>32</sub> | (0,1)                                        | (0,53)                                                                                                         | (0,57)                                                                                                         |
|----------------------------------|----------------------------------------------|----------------------------------------------------------------------------------------------------------------|----------------------------------------------------------------------------------------------------------------|
|                                  | CFSE                                         | CFSE                                                                                                           | CFSE                                                                                                           |
| 4Fe (corner)                     | 1.342 [d <sub>x2-y2</sub> -d <sub>yz</sub> ] | 0.067 [d <sub>yz</sub> -d <sub>z2</sub> ]                                                                      | 0.136 [d <sub>xy</sub> -d <sub>z2</sub> ]                                                                      |
| 5Fe (corner)                     | 1.390 [d <sub>x2-y2</sub> -d <sub>xz</sub> ] | 0.141 [d <sub>x2-y2</sub> -d <sub>xy</sub> ]                                                                   | 0.053 [d <sub>x2-y2</sub> -d <sub>xy</sub> ]                                                                   |
| 10Fe (corner)                    | 0.931 [d <sub>x2-y2</sub> -d <sub>xy</sub> ] | 0.245 [d <sub>x2-y2</sub> -d <sub>xy</sub> ]                                                                   | 0.306 [d <sub>z2</sub> -d <sub>x2-y2</sub> ]                                                                   |
| 16Fe (corner)                    | 1.141 [d <sub>z2</sub> -d <sub>xz</sub> ]    | 0.171 [d <sub>yz</sub> -d <sub>xz</sub> ]                                                                      | 0.17633 [d <sub>yz</sub> -d <sub>xz</sub> ]                                                                    |
| 1Fe (edge)                       | 0.916 [d <sub>z2</sub> -d <sub>yz</sub> ]    | 0.002 [d <sub>z2</sub> -d <sub>xy</sub> ]                                                                      | 0.042 [d <sub>z2</sub> -d <sub>xy</sub> ]                                                                      |
| 3Fe (edge)                       | 1.062 [d <sub>x2-y2</sub> -d <sub>xy</sub> ] | 0.027 [d <sub>yz</sub> -d <sub>x2-y2</sub> ]                                                                   | 0.030 [d <sub>yz</sub> -d <sub>x2-y2</sub> ]                                                                   |
| 6Fe (edge)                       | 0.766 [d <sub>x2-y2</sub> -d <sub>xy</sub> ] | 0.228 [d <sub>yz</sub> -d <sub>xy</sub> ]                                                                      | 0.088 [d <sub>xy</sub> -d <sub>xz</sub> ]                                                                      |
| 7Fe (edge)                       | 0.849 [d <sub>z2</sub> -d <sub>yz</sub> ]    | 0.125 [d <sub>xz</sub> -d <sub>yz</sub> ]                                                                      | 0.135 [d <sub>xz</sub> -d <sub>yz</sub> ]                                                                      |
| 9Fe (edge)                       | 0.944 [d <sub>x2-y2</sub> -d <sub>xy</sub> ] | 0.018 [d <sub>yz</sub> -d <sub>z2</sub> ]                                                                      | 0.283 [d <sub>xy</sub> -d <sub>yz</sub> ]                                                                      |
| 12Fe (edge)                      | 0.925 [d <sub>z2</sub> -d <sub>xz</sub> ]    | 0.198 [d <sub>z2</sub> -d <sub>xz</sub> ]                                                                      | 0.090 [d <sub>z2</sub> -d <sub>xy</sub> ]                                                                      |
| 14Fe (edge)                      | 1.180 [d <sub>z2</sub> -d <sub>yz</sub> ]    | 0.033 [d <sub>xz</sub> -d <sub>yz</sub> ]                                                                      | 0.069 [d <sub>xz</sub> -d <sub>yz</sub> ]                                                                      |
| 15Fe (edge)                      | 0.814 [d <sub>x2-y2</sub> -d <sub>xy</sub> ] | 0.006 [d <sub>yz</sub> -d <sub>z2</sub> ]                                                                      | 0.000 [d <sub>yz</sub> -d <sub>z2</sub> ]                                                                      |
| 2Fe (surface)                    | 0.862 [d <sub>z2</sub> -d <sub>yz</sub> ]    | 0.116 [d <sub>yz</sub> -d <sub>x2-y2</sub> ]                                                                   | 0.013 [d <sub>x2-y2</sub> -d <sub>yz</sub> ] -O <sub>h</sub><br>(0.410 [d <sub>z2</sub> -d <sub>x2-y2</sub> ]) |
| 8Fe (surface)                    | 0.884 [d <sub>z2</sub> -d <sub>yz</sub> ]    | 0.045 [d <sub>yz</sub> -d <sub>x2-y2</sub> ]                                                                   | 0.058 [d <sub>yz</sub> -d <sub>x2-y2</sub> ]                                                                   |
| 11Fe (surface)                   | 0.842 [d <sub>z2</sub> -d <sub>yz</sub> ]    | 0.009 [d <sub>yz</sub> -d <sub>x2-y2</sub> ]                                                                   | 0.010 [d <sub>yz</sub> -d <sub>x2-y2</sub> ]                                                                   |
| 13Fe (surface)                   | 0.905 [d <sub>z2</sub> -d <sub>yz</sub> ]    | 0.013 [d <sub>x2-y2</sub> -d <sub>yz</sub> ] -O <sub>h</sub><br>(0.306 [d <sub>z2</sub> -d <sub>x2-y2</sub> ]) | 0.023 [d <sub>x2-y2</sub> -d <sub>yz</sub> ] -O <sub>h</sub><br>(0.250 [d <sub>z2</sub> -d <sub>x2-y2</sub> ]) |

Table S4. Bader charges, spins, and Mulliken spin densities of Fe(II) ions of the Fe<sub>16</sub>S<sub>32</sub> cluster calculated using the B3LYP functional (SM=53, and 57).

| Fe <sub>16</sub> S <sub>32</sub> | (0,53)   |        |              | (0,57)   |        |        |
|----------------------------------|----------|--------|--------------|----------|--------|--------|
|                                  | B/charge | B/spin | M/spin       | B/charge | B/spin | M/spin |
| 4Fe (corner)                     | 1.020    | 3.396  | 3.419        | 1.020    | 3.396  | 3.420  |
| 5Fe (corner)                     | 1.029    | 3.444  | 3.419        | 1.041    | 3.464  | 3.432  |
| 10Fe (corner)                    | 1.038    | 3.462  | 3.487        | 1.053    | 3.505  | 3.514  |
| 16Fe (corner)                    | 1.044    | 3.453  | 3.419        | 1.043    | 3.453  | 3.419  |
| 1Fe (edge)                       | 1.059    | 3.422  | 3.510        | 1.070    | 3.447  | 3.520  |
| 3Fe (edge)                       | 1.054    | 3.451  | 3.393        | 1.054    | 3.450  | 3.392  |
| 6Fe (edge)                       | 0.906    | 2.177  | <b>2.277</b> | 1.080    | 3.450  | 3.477  |
| 7Fe (edge)                       | 1.072    | 3.444  | 3.449        | 1.073    | 3.451  | 3.443  |
| 9Fe (edge)                       | 0.896    | 2.222  | <b>2.291</b> | 1.077    | 3.444  | 3.423  |

|                |       |       |              |       |       |              |
|----------------|-------|-------|--------------|-------|-------|--------------|
| 12Fe (edge)    | 1.071 | 3.443 | 3.490        | 1.072 | 3.442 | 3.486        |
| 14Fe (edge)    | 1.050 | 3.442 | 3.349        | 1.055 | 3.462 | 3.366        |
| 15Fe (edge)    | 1.064 | 3.422 | 3.530        | 1.064 | 3.424 | 3.532        |
| 2Fe (surface)  | 0.884 | 2.101 | <b>2.204</b> | 0.885 | 2.113 | <b>2.164</b> |
| 8Fe (surface)  | 0.877 | 2.094 | <b>2.376</b> | 0.878 | 2.098 | <b>2.368</b> |
| 11Fe (surface) | 0.881 | 2.113 | <b>2.233</b> | 0.883 | 2.119 | <b>2.234</b> |
| 13Fe (surface) | 0.878 | 2.061 | <b>2.240</b> | 0.883 | 2.098 | <b>2.235</b> |

Table S5. CFSEs (eV) calculated for the Fe(II) ions of the Fe<sub>32</sub>S<sub>64</sub> cluster corresponding to the AFM spin configuration of SM=9 and Bader charges, spins, and Mulliken spin density values.

| Fe <sub>32</sub> S <sub>64</sub> | (0,9) AFM                                                                                                                                                 |          |        |              |
|----------------------------------|-----------------------------------------------------------------------------------------------------------------------------------------------------------|----------|--------|--------------|
|                                  | CFSE                                                                                                                                                      | B/charge | B/spin | M/spin       |
| 6Fe (corner)                     | 0.121 [d <sub>z2</sub> -d <sub>x2-y2</sub> ]                                                                                                              | 0.986    | 3.320  | 3.342        |
| 12Fe (corner)                    | 0.245 [d <sub>x2-y2</sub> -d <sub>xz</sub> ]                                                                                                              | 1.009    | 3.375  | 3.372        |
| 75Fe (corner)                    | 0.039 [d <sub>x2-y2</sub> -d <sub>yz</sub> ]                                                                                                              | 1.009    | 3.383  | 3.380        |
| 81Fe (corner)                    | 0.097 [d <sub>xz</sub> -d <sub>xy</sub> ]                                                                                                                 | 1.032    | 3.426  | 3.389        |
| 17Fe (edge)                      | 0.167 [d <sub>x2-y2</sub> -d <sub>xz</sub> ] -O <sub>h</sub><br>0.121 [d <sub>z2</sub> -d <sub>x2-y2</sub> ]<br>1.347 [d <sub>yz</sub> -d <sub>xy</sub> ] | 1.027    | 3.380  | 3.186        |
| 18Fe (edge)                      | 0.093 [d <sub>xz</sub> -d <sub>xy</sub> ]                                                                                                                 | 1.032    | 3.359  | 3.264        |
| 42Fe (edge)                      | 0.238 [d <sub>z2</sub> -d <sub>yz</sub> ]                                                                                                                 | 1.022    | 3.365  | 3.184        |
| 51Fe (edge)                      | 0.024 [d <sub>xz</sub> -d <sub>xy</sub> ]                                                                                                                 | 1.032    | 3.350  | 3.257        |
| 62Fe (edge)                      | 0.074 [d <sub>x2-y2</sub> -d <sub>xy</sub> ] -O <sub>h</sub><br>0.828 [d <sub>z2</sub> -d <sub>x2-y2</sub> ]                                              | 1.044    | 3.350  | 3.402        |
| 66Fe (edge)                      | 0.151 [d <sub>z2</sub> -d <sub>xz</sub> ] -O <sub>h</sub><br>0.751 [d <sub>x2-y2</sub> -d <sub>z2</sub> ]                                                 | 1.046    | 3.333  | 3.337        |
| 72Fe (edge)                      | 0.763 [d <sub>x2-y2</sub> -d <sub>xy</sub> ] -O <sub>h</sub><br>0.137 [d <sub>z2</sub> -d <sub>x2-y2</sub> ]                                              | 1.036    | 3.333  | 3.400        |
| 78Fe (edge)                      | 0.144 [d <sub>x2-y2</sub> -d <sub>xy</sub> ]                                                                                                              | 1.046    | 3.330  | 3.336        |
| 82Fe (edge)                      | 0.040 [d <sub>z2</sub> -d <sub>yz</sub> ] -O <sub>h</sub><br>0.251 [d <sub>x2-y2</sub> -d <sub>z2</sub> ]<br>1.894 [d <sub>xz</sub> -d <sub>xy</sub> ]    | 1.029    | 3.371  | 3.168        |
| 83Fe (edge)                      | 0.242 [d <sub>xy</sub> -d <sub>xz</sub> ]                                                                                                                 | 1.036    | 3.335  | 3.405        |
| 93Fe (edge)                      | 0.024 [d <sub>yz</sub> -d <sub>xz</sub> ]                                                                                                                 | 1.043    | 3.330  | 3.332        |
| 94Fe (edge)                      | 0.336 [d <sub>yz</sub> -d <sub>x2-y2</sub> ]                                                                                                              | 1.033    | 3.339  | 3.260        |
| 28Fe (surface)                   | 0.152 [d <sub>xy</sub> -d <sub>yz</sub> ]                                                                                                                 | 1.036    | 3.238  | 3.308        |
| 40Fe (surface)                   | 0.190 [d <sub>xz</sub> -d <sub>yz</sub> ]                                                                                                                 | 1.051    | 3.283  | 3.299        |
| 41Fe (surface)                   | 0.331 [d <sub>xy</sub> -d <sub>x2-y2</sub> ]                                                                                                              | 0.873    | 1.925  | <b>2.049</b> |
| 49Fe (surface)                   | 0.394 [d <sub>x2-y2</sub> -d <sub>xz</sub> ]                                                                                                              | 1.043    | 3.295  | 3.184        |
| 52Fe (surface)                   | 0.024 [d <sub>z2</sub> -d <sub>xz</sub> ]                                                                                                                 | 0.879    | 2.022  | <b>1.990</b> |
| 58Fe (surface)                   | 0.131 [d <sub>yz</sub> -d <sub>z2</sub> ]                                                                                                                 | 1.040    | 3.273  | 3.345        |
| 61Fe (surface)                   | 0.079 [d <sub>x2-y2</sub> -d <sub>z2</sub> ]                                                                                                              | 1.050    | 3.288  | 3.326        |
| 64Fe (surface)                   | 0.064 [d <sub>x2-y2</sub> -d <sub>z2</sub> ]                                                                                                              | 1.038    | 3.277  | 3.322        |
| 76Fe (surface)                   | 0.491 [d <sub>yz</sub> -d <sub>xz</sub> ]                                                                                                                 | 1.045    | 3.270  | 3.290        |
| 80Fe (surface)                   | 0.216 [d <sub>z2</sub> -d <sub>xy</sub> ]                                                                                                                 | 1.032    | 3.278  | 3.322        |
| 87Fe (surface)                   | 0.749 [d <sub>xy</sub> -d <sub>yz</sub> ]                                                                                                                 | 1.030    | 3.248  | 3.334        |
| 90Fe (surface)                   | 0.484 [d <sub>x2-y2</sub> -d <sub>xz</sub> ]                                                                                                              | 1.041    | 3.285  | 3.163        |



|             |                                |       |       |       |
|-------------|--------------------------------|-------|-------|-------|
| 50Fe (bulk) | 0.303 [ $d_{xy} - d_{z2}$ ]    | 0.759 | 0.002 | 0.471 |
| 63Fe (bulk) | 0.930 [ $d_{xz} - d_{x2-y2}$ ] | 0.766 | 0.032 | 0.439 |
| 67Fe (bulk) | 0.480 [ $d_{yz} - d_{z2}$ ]    | 0.764 | 0.030 | 0.356 |
| 96Fe (bulk) | 0.854 [ $d_{xz} - d_{z2}$ ]    | 0.758 | 0.037 | 0.367 |

Table S6. CFSEs (eV) calculated for the Fe(II) ions of the Fe<sub>32</sub>S<sub>64</sub> cluster corresponding to the AFM spin configuration of SM=5 and Bader charges, spins, and Mulliken spin density values.

| Fe <sub>32</sub> S <sub>64</sub> | (0,5) AFM                                                                                                                          |          |        |        |
|----------------------------------|------------------------------------------------------------------------------------------------------------------------------------|----------|--------|--------|
|                                  | CFSE                                                                                                                               | B/charge | B/spin | M/spin |
| 6Fe (corner)                     | 0.120 [ $d_{xy} - d_{xz}$ ]                                                                                                        | 1.010    | 3.378  | 3.384  |
| 12Fe (corner)                    | 0.882 [ $d_{x2-y2} - d_{yz}$ ] -O <sub>h</sub><br>0.047 [ $d_{z2} - d_{x2-y2}$ ]<br>0.851 [ $d_{xz} - d_{xy}$ ]                    | 1.028    | 3.394  | 3.381  |
| 75Fe (corner)                    | 0.139 [ $d_{x2-y2} - d_{xz}$ ] -O <sub>h</sub><br>0.495 [ $d_{z2} - d_{x2-y2}$ ]                                                   | 1.026    | 3.400  | 3.396  |
| 81Fe (corner)                    | 0.824 [ $d_{z2} - d_{yz}$ ]                                                                                                        | 1.030    | 3.397  | 3.393  |
| 17Fe (edge)                      | 0.434 [ $d_{x2-y2} - d_{xz}$ ]                                                                                                     | 1.028    | 3.382  | 3.190  |
| 18Fe (edge)                      | 0.838 [ $d_{z2} - d_{xz}$ ]                                                                                                        | 1.025    | 3.320  | 3.241  |
| 42Fe (edge)                      | 0.156 [ $d_{xy} - d_{xz}$ ]                                                                                                        | 1.026    | 3.382  | 3.190  |
| 51Fe (edge)                      | 0.021 [ $d_{yz} - d_{xy}$ ]                                                                                                        | 1.030    | 3.321  | 3.237  |
| 62Fe (edge)                      | 0.299 [ $d_{yz} - d_{z2}$ ]                                                                                                        | 1.064    | 3.402  | 3.433  |
| 66Fe (edge)                      | 0.439 [ $d_{x2-y2} - d_{yz}$ ]                                                                                                     | 1.041    | 3.339  | 3.325  |
| 72Fe (edge)                      | 0.199 [ $d_{z2} - d_{yz}$ ]                                                                                                        | 1.059    | 3.403  | 3.440  |
| 78Fe (edge)                      | 0.348 [ $d_{xy} - d_{xz}$ ]                                                                                                        | 1.043    | 3.339  | 3.324  |
| 82Fe (edge)                      | 0.341 [ $d_{x2-y2} - d_{yz}$ ]                                                                                                     | 1.028    | 3.383  | 3.189  |
| 83Fe (edge)                      | 0.513 [ $d_{z2} - d_{xz}$ ]                                                                                                        | 1.054    | 3.398  | 3.436  |
| 93Fe (edge)                      | 0.427 [ $d_{xz} - d_{yz}$ ]                                                                                                        | 1.044    | 3.369  | 3.332  |
| 94Fe (edge)                      | 0.063 [ $d_{z2} - d_{xz}$ ] -O <sub>h</sub><br>0.787 [ $d_{x2-y2} - d_{z2}$ ]                                                      | 1.028    | 3.322  | 3.236  |
| 28Fe (surface)                   | 0.708 [ $d_{x2-y2} - d_{yz}$ ]                                                                                                     | 0.878    | 1.950  | 2.022  |
| 40Fe (surface)                   | 0.809 [ $d_{yz} - d_{z2}$ ]                                                                                                        | 0.878    | 1.923  | 1.909  |
| 41Fe (surface)                   | 0.343 [ $d_{x2-y2} - d_{xy}$ ]                                                                                                     | 0.873    | 1.952  | 2.017  |
| 49Fe (surface)                   | 0.114 [ $d_{xy} - d_{x2-y2}$ ]                                                                                                     | 0.878    | 1.978  | 1.960  |
| 52Fe (surface)                   | 0.314 [ $d_{xz} - d_{x2-y2}$ ] -T <sub>d</sub> order<br>[Four sets, $d_{z2}$ and $d_{x2-y2}$ , $d_{xz}$ ,<br>$d_{yz}$ , $d_{xy}$ ] | 0.879    | 2.010  | 1.987  |
| 58Fe (surface)                   | 0.098 [ $d_{yz} - d_{x2-y2}$ ]                                                                                                     | 0.872    | 1.914  | 2.050  |
| 61Fe (surface)                   | 1.623 [ $d_{x2-y2} - d_{z2}$ ]                                                                                                     | 0.883    | 1.903  | 1.899  |
| 64Fe (surface)                   | 0.038 [ $d_{x2-y2} - d_{yz}$ ] -O <sub>h</sub><br>0.115 [ $d_{z2} - d_{x2-y2}$ ]                                                   | 0.874    | 1.933  | 2.088  |
| 76Fe (surface)                   | 1.314 [ $d_{yz} - d_{z2}$ ]                                                                                                        | 0.874    | 1.928  | 1.923  |
| 80Fe (surface)                   | 0.147 [ $d_{z2} - d_{x2-y2}$ ]                                                                                                     | 0.875    | 1.924  | 2.065  |
| 87Fe (surface)                   | 1.117 [ $d_{xy} - d_{x2-y2}$ ]                                                                                                     | 0.868    | 1.945  | 2.005  |
| 90Fe (surface)                   | 0.691 [ $d_{yz} - d_{xz}$ ]                                                                                                        | 0.877    | 2.002  | 1.972  |
| 50Fe (bulk)                      | 0.207 [ $d_{xy} - d_{x2-y2}$ ]                                                                                                     | 0.759    | 0.005  | 0.338  |
| 63Fe (bulk)                      | 0.008 [ $d_{xy} - d_{x2-y2}$ ] -T <sub>d</sub> order                                                                               | 0.762    | 0.018  | 0.393  |

|             |                                                                                  |       |       |       |
|-------------|----------------------------------------------------------------------------------|-------|-------|-------|
|             | [three sets, $d_{z^2}$ , $d_{x^2-y^2}$ and $d_{xy}$ ,<br>$d_{xz}$ and $d_{yz}$ ] |       |       |       |
| 67Fe (bulk) | 0.599 [ $d_{yz} - d_{z^2}$ ]                                                     | 0.762 | 0.021 | 0.341 |
| 96Fe (bulk) | 0.765 [ $d_{xz} - d_{z^2}$ ]                                                     | 0.756 | 0.013 | 0.346 |

Table S7.  $\text{Fe}_4\text{S}_8$  cluster –Mulliken and Hirshfeld spins.

| $\text{Fe}_4\text{S}_8$ | (0,17)<br>Mulliken spins | (0,17)<br>Hirshfeld spins |
|-------------------------|--------------------------|---------------------------|
| 2Fe                     | 3.445                    | 3.397                     |
| 7Fe                     | 3.442                    | 3.388                     |
| 10Fe                    | 3.522                    | 3.486                     |
| 12Fe                    | 3.442                    | 3.393                     |

Table S8.  $\text{Fe}_8\text{S}_{16}$  cluster –Mulliken and Hirshfeld spins.

| $\text{Fe}_8\text{S}_{16}$ | (0,33)<br>Mulliken spins | (0,33)<br>Hirshfeld spins |
|----------------------------|--------------------------|---------------------------|
| 1Fe                        | 3.506                    | 3.430                     |
| 2Fe                        | 3.444                    | 3.395                     |
| 3Fe                        | 3.444                    | 3.401                     |
| 4Fe                        | 3.541                    | 3.431                     |
| 5Fe                        | 3.532                    | 3.432                     |
| 6Fe                        | 3.536                    | 3.501                     |
| 7Fe                        | 3.564                    | 3.417                     |
| 8Fe                        | 3.430                    | 3.436                     |
